# Supplementary material for: Protocol of a multiphase study on telemedicine for older adults in primary care
Source: HighWire-hosted journal article supplement (doi:10.1136/bmjopen-2021-057061), 2022-04-01
Supplement: bmjopen-2021-057061supp001_data_supplement.pdf [file bmjopen-2021-057061supp001_data_supplement.pdf]

## Appendix 1. Example of search strategy

Database: Embase Classic+Embase Search Strategy: -----  
----- 1 telemedicine.mp. (33037)  
2 distance counsel\*.mp. (18)  
3 remote consult\*.mp. (674)  
4 telehealth.mp. (11717)  
5 etherap\*.mp. (19)  
6 E-Counsel\*.mp. (277)  
7 health mobile.mp. (126)  
8 mHealth.mp. (4757)  
9 eHealth.mp. (4387)  
10 telecare.mp. (938)  
11 teleconsult\*.mp. (10858)  
12 ehealth\*.mp. (4418)  
13 teleguide\*.mp. (7)  
14 telemed\*.mp. (33537)  
15 Remote video\*.mp. (187)  
16 Video conferenc\*.mp. (1449)  
17 Video chat.mp. (120)  
18 Video visit\*.mp. (203)  
19 telephone.mp. (93893)  
20 Video consultat\*.mp. (462)  
21 tele-coach\*.mp. (16)  
22 Virtual provider\*.mp. (8)  
23 Virtual appointment\*.mp. (28)  
24 Virtual consult\*.mp. (194)  
25 Skype.mp. (793)  
26 Telehealthcare.mp. (106)  
27 E-health.mp. (4075)  
28 Econsult\*.mp. (228)  
29 Health Informatic\*.mp. (2886)  
30 1 or 2 or 3 or 4 or 5 or 6 or 7 or 8 or 9 or 10 or 11 or 12 or 13 or 14 or 15 or 16 or 17 or 18 or 19 or 20  
or 21 or 22 or 23 or 24 or 25 or 26 or 27 or 28 or 29 (146752)  
31 Elderly.mp. (580606)  
32 aging.mp. (634135)  
33 Geriatric\*.mp. (158008)  
34 Older Adult\*.mp. (107225)  
35 Senior\*.mp. (60434)  
36 ageing.mp. (64194)  
37 31 or 32 or 33 or 34 or 35 or 36 (1326974)  
38 primary healthcare.mp. (7883)  
39 Family Practice.mp. (10065)  
40 Family physician\*.mp. (19413)  
41 General practice.mp. (102902)  
42 Primary Care.mp. (162973)  
43 Primary health care.mp. (80279)  
44 38 or 39 or 40 or 41 or 42 or 43 (312072)  
45 30 and 37 and 44 (1083)
